# Supplementary material
Source: publisher figshare collection journal article supplement (https://acs.figshare.com/ndownloader/files/5882508)
Supplement: Supplementary file 1 [file 5882508]

# om020612n.cif

Intramolecular Dehydrofluorinative Coupling of (5-Pentamethylcyclopentadienyl and Pentafluorophenylphosphine Ligands in Rhodium Complexes 

Ronan M. Bellabarba, Mark Nieuwenhuyzen and Graham C. Saunders*
School of Chemistry, Queen's University Belfast, David Keir Building, Belfast, UK BT9 5AG. Email:g.saunders@qub.ac.uk  


data_compound 2
  
_audit_creation_method            SHELXL-97 
_chemical_name_systematic 
; 
 ? 
; 
_chemical_name_common             ? 
_chemical_melting_point           ? 
_chemical_formula_moiety          ? 
_chemical_formula_sum 
 'C38 H20 B Cl7 F23 P2 Rh' 
_chemical_formula_weight          1337.35 
  
loop_ 
 _atom_type_symbol 
 _atom_type_description 
 _atom_type_scat_dispersion_real 
 _atom_type_scat_dispersion_imag 
 _atom_type_scat_source 
 'C'  'C'   0.0033   0.0016 
 'International Tables Vol C Tables 4.2.6.8 and 6.1.1.4' 
 'H'  'H'   0.0000   0.0000 
 'International Tables Vol C Tables 4.2.6.8 and 6.1.1.4' 
 'F'  'F'   0.0171   0.0103 
 'International Tables Vol C Tables 4.2.6.8 and 6.1.1.4' 
 'P'  'P'   0.1023   0.0942 
 'International Tables Vol C Tables 4.2.6.8 and 6.1.1.4' 
 'Cl'  'Cl'   0.1484   0.1585 
 'International Tables Vol C Tables 4.2.6.8 and 6.1.1.4' 
 'Rh'  'Rh'  -1.1178   0.9187 
 'International Tables Vol C Tables 4.2.6.8 and 6.1.1.4' 
 'B'  'B'   0.0013   0.0007 
 'International Tables Vol C Tables 4.2.6.8 and 6.1.1.4' 
  
_symmetry_cell_setting            Triclinic 
_symmetry_space_group_name_H-M    P-1 
  
loop_ 
 _symmetry_equiv_pos_as_xyz 
 'x, y, z' 
 '-x, -y, -z' 
  
_cell_length_a                    12.2595(8) 
_cell_length_b                    14.1355(9) 
_cell_length_c                    14.7311(10) 
_cell_angle_alpha                 86.1140(10) 
_cell_angle_beta                  69.5290(10) 
_cell_angle_gamma                 75.0530(10) 
_cell_volume                      2310.0(3) 
_cell_formula_units_Z             2 
_cell_measurement_temperature     153(2) 
_cell_measurement_reflns_used     ? 
_cell_measurement_theta_min       ? 
_cell_measurement_theta_max       ? 
  
_exptl_crystal_description        block 
_exptl_crystal_colour             yellow 
_exptl_crystal_size_max           0.38 
_exptl_crystal_size_mid           0.28 
_exptl_crystal_size_min           0.24 
_exptl_crystal_density_meas       not_measured 
_exptl_crystal_density_diffrn     1.923 
_exptl_crystal_density_method     'not measured' 
_exptl_crystal_F_000              1308 
_exptl_absorpt_coefficient_mu     0.969 
_exptl_absorpt_correction_type    emprical 
_exptl_absorpt_correction_T_min   0.7096 
_exptl_absorpt_correction_T_max   0.8007 
_exptl_absorpt_process_details    'SADABS (Bruker 1998)'
  
_exptl_special_details 
; 
 ? 
; 
  
_diffrn_ambient_temperature       153(2) 
_diffrn_radiation_wavelength      0.71073 
_diffrn_radiation_type            MoK\a 
_diffrn_radiation_source          'fine-focus sealed tube' 
_diffrn_radiation_monochromator   graphite 
_diffrn_measurement_device_type   'CCD area detector' 
_diffrn_measurement_method        'phi and omega scans' 
_diffrn_detector_area_resol_mean  ? 
_diffrn_standards_number          ? 
_diffrn_standards_interval_count  ? 
_diffrn_standards_interval_time   ? 
_diffrn_standards_decay_%         ? 
_diffrn_reflns_number             20235 
_diffrn_reflns_av_R_equivalents   0.0683 
_diffrn_reflns_av_sigmaI/netI     0.1011 
_diffrn_reflns_limit_h_min        -16 
_diffrn_reflns_limit_h_max        15 
_diffrn_reflns_limit_k_min        -18 
_diffrn_reflns_limit_k_max        17 
_diffrn_reflns_limit_l_min        -19 
_diffrn_reflns_limit_l_max        19 
_diffrn_reflns_theta_min          1.48 
_diffrn_reflns_theta_max          28.73 
_reflns_number_total              10397 
_reflns_number_gt                 6753 
_reflns_threshold_expression      >2sigma(I) 
  
_computing_data_collection        'Bruker SMART' 
_computing_cell_refinement        'Bruker SMART' 
_computing_data_reduction         'Bruker SHELXTL' 
_computing_structure_solution     'SHELXS-97 (Sheldrick, 1997)' 
_computing_structure_refinement   'SHELXL-97 (Sheldrick, 1997)' 
_computing_molecular_graphics     'Bruker SHELXTL' 
_computing_publication_material   'Bruker SHELXTL' 
  
_refine_special_details 
; 
 Refinement of F^2^ against ALL reflections.  The weighted R-factor wR and 
 goodness of fit S are based on F^2^, conventional R-factors R are based 
 on F, with F set to zero for negative F^2^. The threshold expression of 
 F^2^ > 2sigma(F^2^) is used only for calculating R-factors(gt) etc. and is 
 not relevant to the choice of reflections for refinement.  R-factors based 
 on F^2^ are statistically about twice as large as those based on F, and R- 
 factors based on ALL data will be even larger. 
; 
  
_refine_ls_structure_factor_coef  Fsqd 
_refine_ls_matrix_type            full 
_refine_ls_weighting_scheme       calc 
_refine_ls_weighting_details 
 'calc w=1/[\s^2^(Fo^2^)+(0.0481P)^2^+0.0000P] where P=(Fo^2^+2Fc^2^)/3' 
_atom_sites_solution_primary      direct 
_atom_sites_solution_secondary    difmap 
_atom_sites_solution_hydrogens    geom 
_refine_ls_hydrogen_treatment     calc 
_refine_ls_extinction_method      none 
_refine_ls_extinction_coef        ? 
_refine_ls_number_reflns          10397 
_refine_ls_number_parameters      653 
_refine_ls_number_restraints      0 
_refine_ls_R_factor_all           0.0830 
_refine_ls_R_factor_gt            0.0507 
_refine_ls_wR_factor_ref          0.1144 
_refine_ls_wR_factor_gt           0.1011 
_refine_ls_goodness_of_fit_ref    0.926 
_refine_ls_restrained_S_all       0.926 
_refine_ls_shift/su_max           0.002 
_refine_ls_shift/su_mean          0.000 
  
loop_ 
 _atom_site_label 
 _atom_site_type_symbol 
 _atom_site_fract_x 
 _atom_site_fract_y 
 _atom_site_fract_z 
 _atom_site_U_iso_or_equiv 
 _atom_site_adp_type 
 _atom_site_occupancy 
 _atom_site_symmetry_multiplicity 
 _atom_site_calc_flag 
 _atom_site_refinement_flags 
 _atom_site_disorder_assembly 
 _atom_site_disorder_group 
Rh1 Rh -0.21881(3) 0.15834(2) 0.22110(2) 0.02036(9) Uani 1 1 d . . . 
C1 C -0.1954(4) 0.0489(3) 0.3268(3) 0.0236(9) Uani 1 1 d . . . 
C2 C -0.2449(4) 0.0105(3) 0.1988(3) 0.0271(9) Uani 1 1 d . . . 
C3 C -0.3517(4) 0.0633(3) 0.2689(3) 0.0271(9) Uani 1 1 d . . . 
C4 C -0.3203(4) 0.0913(3) 0.3479(3) 0.0245(9) Uani 1 1 d . . . 
C5 C -0.1466(4) 0.0018(3) 0.2340(3) 0.0249(9) Uani 1 1 d . . . 
C6 C -0.0208(4) -0.0555(3) 0.1834(3) 0.0318(10) Uani 1 1 d . . . 
H6A H -0.0143 -0.1251 0.1971 0.048 Uiso 1 1 calc R . . 
H6B H 0.0343 -0.0327 0.2063 0.048 Uiso 1 1 calc R . . 
H6C H 0.0003 -0.0462 0.1133 0.048 Uiso 1 1 calc R . . 
C7 C -0.2337(4) -0.0389(3) 0.1088(3) 0.0383(11) Uani 1 1 d . . . 
H7A H -0.2128 -0.1100 0.1160 0.057 Uiso 1 1 calc R . . 
H7B H -0.1705 -0.0204 0.0538 0.057 Uiso 1 1 calc R . . 
H7C H -0.3103 -0.0186 0.0972 0.057 Uiso 1 1 calc R . . 
C8 C -0.4770(4) 0.0785(3) 0.2700(3) 0.0357(11) Uani 1 1 d . . . 
H8A H -0.5074 0.0215 0.2981 0.054 Uiso 1 1 calc R . . 
H8B H -0.4776 0.0867 0.2036 0.054 Uiso 1 1 calc R . . 
H8C H -0.5283 0.1373 0.3092 0.054 Uiso 1 1 calc R . . 
C9 C -0.4077(4) 0.1380(3) 0.4423(3) 0.0312(10) Uani 1 1 d . . . 
H9A H -0.4361 0.0873 0.4862 0.047 Uiso 1 1 calc R . . 
H9B H -0.4762 0.1844 0.4312 0.047 Uiso 1 1 calc R . . 
H9C H -0.3681 0.1728 0.4714 0.047 Uiso 1 1 calc R . . 
C10 C -0.1289(4) 0.0415(3) 0.3968(3) 0.0256(9) Uani 1 1 d . . . 
H10A H -0.0450 0.0042 0.3633 0.031 Uiso 1 1 calc R . . 
H10B H -0.1648 0.0011 0.4511 0.031 Uiso 1 1 calc R . . 
C11 C -0.2000(4) 0.3760(3) 0.2806(3) 0.0253(9) Uani 1 1 d . . . 
H11A H -0.2578 0.3913 0.3475 0.030 Uiso 1 1 calc R . . 
H11B H -0.1419 0.4168 0.2681 0.030 Uiso 1 1 calc R . . 
C12 C -0.2680(4) 0.4025(3) 0.2099(3) 0.0266(9) Uani 1 1 d . . . 
H12A H -0.2112 0.4131 0.1454 0.032 Uiso 1 1 calc R . . 
H12B H -0.3300 0.4648 0.2320 0.032 Uiso 1 1 calc R . . 
Cl1 Cl -0.08666(9) 0.16834(7) 0.05921(7) 0.0258(2) Uani 1 1 d . . . 
P1 P -0.11894(9) 0.24660(7) 0.27174(7) 0.0205(2) Uani 1 1 d . . . 
C11A C -0.1082(3) 0.2210(3) 0.3918(3) 0.0219(8) Uani 1 1 d . . . 
C12A C -0.0875(3) 0.2920(3) 0.4400(3) 0.0255(9) Uani 1 1 d . . . 
F12A F -0.0647(2) 0.37423(17) 0.39526(17) 0.0316(6) Uani 1 1 d . . . 
C13A C -0.0881(4) 0.2835(3) 0.5342(3) 0.0293(10) Uani 1 1 d . . . 
F13A F -0.0734(2) 0.35606(18) 0.57815(17) 0.0378(6) Uani 1 1 d . . . 
C14A C -0.1069(4) 0.1991(3) 0.5818(3) 0.0282(10) Uani 1 1 d . . . 
F14A F -0.1104(2) 0.18831(19) 0.67356(16) 0.0374(6) Uani 1 1 d . . . 
C15A C -0.1217(4) 0.1257(3) 0.5342(3) 0.0259(9) Uani 1 1 d . . . 
F15A F -0.1333(2) 0.04191(17) 0.58287(16) 0.0317(6) Uani 1 1 d . . . 
C16A C -0.1236(3) 0.1334(3) 0.4407(3) 0.0224(9) Uani 1 1 d . . . 
C11B C 0.0374(3) 0.2386(3) 0.1949(3) 0.0244(9) Uani 1 1 d . . . 
C12B C 0.1294(4) 0.1595(3) 0.2001(3) 0.0311(10) Uani 1 1 d . . . 
F12B F 0.1039(2) 0.09030(19) 0.26560(19) 0.0412(7) Uani 1 1 d . . . 
C13B C 0.2470(4) 0.1466(4) 0.1409(3) 0.0393(12) Uani 1 1 d . . . 
F13B F 0.3316(2) 0.0684(2) 0.1502(2) 0.0577(8) Uani 1 1 d . . . 
C14B C 0.2787(4) 0.2146(4) 0.0729(3) 0.0440(13) Uani 1 1 d . . . 
F14B F 0.3935(2) 0.2037(3) 0.0158(2) 0.0634(9) Uani 1 1 d . . . 
C15B C 0.1915(4) 0.2952(4) 0.0647(3) 0.0395(12) Uani 1 1 d . . . 
F15B F 0.2198(3) 0.3635(2) -0.0010(2) 0.0572(8) Uani 1 1 d . . . 
C16B C 0.0729(4) 0.3052(3) 0.1239(3) 0.0321(10) Uani 1 1 d . . . 
F16B F -0.0073(2) 0.38275(19) 0.10787(17) 0.0386(6) Uani 1 1 d . . . 
P2 P -0.34112(9) 0.30734(8) 0.19796(7) 0.0228(2) Uani 1 1 d . . . 
C21A C -0.4994(4) 0.3475(3) 0.2765(3) 0.0250(9) Uani 1 1 d . . . 
C22A C -0.5364(4) 0.3995(3) 0.3638(3) 0.0296(10) Uani 1 1 d . . . 
F22A F -0.4556(2) 0.42271(19) 0.39478(17) 0.0384(6) Uani 1 1 d . . . 
C23A C -0.6556(4) 0.4286(3) 0.4242(3) 0.0316(10) Uani 1 1 d . . . 
F23A F -0.6844(2) 0.4787(2) 0.50641(18) 0.0460(7) Uani 1 1 d . . . 
C24A C -0.7430(4) 0.4033(3) 0.3990(3) 0.0350(11) Uani 1 1 d . . . 
F24A F -0.8567(2) 0.4275(2) 0.4580(2) 0.0468(7) Uani 1 1 d . . . 
C25A C -0.7097(4) 0.3502(3) 0.3158(3) 0.0304(10) Uani 1 1 d . . . 
F25A F -0.7936(2) 0.3235(2) 0.2910(2) 0.0456(7) Uani 1 1 d . . . 
C26A C -0.5913(4) 0.3245(3) 0.2557(3) 0.0295(10) Uani 1 1 d . . . 
F26A F -0.5665(2) 0.27335(18) 0.17343(17) 0.0362(6) Uani 1 1 d . . . 
C21B C -0.3519(3) 0.3291(3) 0.0766(3) 0.0249(9) Uani 1 1 d . . . 
C22B C -0.3380(4) 0.2522(3) 0.0164(3) 0.0285(10) Uani 1 1 d . . . 
F22B F -0.3365(2) 0.16219(17) 0.05086(17) 0.0343(6) Uani 1 1 d . . . 
C23B C -0.3286(4) 0.2641(3) -0.0801(3) 0.0353(11) Uani 1 1 d . . . 
F23B F -0.3129(3) 0.1867(2) -0.13436(19) 0.0501(7) Uani 1 1 d . . . 
C24B C -0.3347(4) 0.3556(4) -0.1183(3) 0.0366(11) Uani 1 1 d . . . 
F24B F -0.3233(3) 0.3679(2) -0.21172(18) 0.0525(8) Uani 1 1 d . . . 
C25B C -0.3534(4) 0.4330(3) -0.0611(3) 0.0323(10) Uani 1 1 d . . . 
F25B F -0.3632(2) 0.52492(19) -0.09676(18) 0.0443(7) Uani 1 1 d . . . 
C26B C -0.3627(4) 0.4212(3) 0.0347(3) 0.0268(9) Uani 1 1 d . . . 
F26B F -0.3845(2) 0.50145(17) 0.08796(17) 0.0354(6) Uani 1 1 d . . . 
B1 B 0.2685(5) -0.8282(4) -0.4291(4) 0.0429(14) Uani 1 1 d . . . 
F24 F 0.2994(3) -0.7443(2) -0.4630(3) 0.0791(11) Uani 1 1 d . . . 
F23 F 0.3095(3) -0.9015(3) -0.4964(3) 0.0865(12) Uani 1 1 d . . . 
F22 F 0.3274(3) -0.8616(3) -0.3637(3) 0.0821(11) Uani 1 1 d . . . 
F21 F 0.1464(2) -0.8137(2) -0.3811(2) 0.0593(8) Uani 1 1 d . . . 
C1S C -0.4921(4) 0.7467(3) 0.3125(3) 0.0385(11) Uani 1 1 d . . . 
H1S H -0.4298 0.7619 0.3343 0.046 Uiso 1 1 calc R . . 
Cl1S Cl -0.55903(17) 0.66218(10) 0.39177(11) 0.0702(5) Uani 1 1 d . . . 
Cl2S Cl -0.42332(13) 0.69536(12) 0.19494(10) 0.0649(4) Uani 1 1 d . . . 
Cl3S Cl -0.60035(11) 0.85453(9) 0.31297(9) 0.0419(3) Uani 1 1 d . . . 
C2S C 1.0291(4) -0.6346(3) -0.2321(4) 0.0379(11) Uani 1 1 d . . . 
H2S H 1.0404 -0.6813 -0.2846 0.046 Uiso 1 1 calc R . . 
Cl4S Cl 0.93162(12) -0.52220(9) -0.24340(10) 0.0486(3) Uani 1 1 d . . . 
Cl5S Cl 0.96752(14) -0.68433(10) -0.11893(10) 0.0567(4) Uani 1 1 d . . . 
Cl6S Cl 1.16893(13) -0.61771(11) -0.24094(16) 0.0853(6) Uani 1 1 d . . . 
  
loop_ 
 _atom_site_aniso_label 
 _atom_site_aniso_U_11 
 _atom_site_aniso_U_22 
 _atom_site_aniso_U_33 
 _atom_site_aniso_U_23 
 _atom_site_aniso_U_13 
 _atom_site_aniso_U_12 
Rh1 0.02172(17) 0.02035(17) 0.02000(17) 0.00288(12) -0.00870(13) -0.00547(13) 
C1 0.032(2) 0.018(2) 0.026(2) 0.0064(17) -0.0149(18) -0.0091(18) 
C2 0.035(2) 0.019(2) 0.033(2) 0.0040(18) -0.017(2) -0.0095(18) 
C3 0.035(2) 0.022(2) 0.030(2) 0.0086(18) -0.016(2) -0.0123(19) 
C4 0.025(2) 0.022(2) 0.027(2) 0.0069(17) -0.0093(18) -0.0079(17) 
C5 0.032(2) 0.017(2) 0.026(2) 0.0061(17) -0.0125(19) -0.0037(17) 
C6 0.034(3) 0.027(2) 0.029(2) -0.0015(19) -0.011(2) 0.0014(19) 
C7 0.056(3) 0.028(3) 0.039(3) -0.007(2) -0.025(2) -0.009(2) 
C8 0.034(3) 0.036(3) 0.046(3) 0.010(2) -0.020(2) -0.018(2) 
C9 0.030(2) 0.034(3) 0.027(2) 0.0040(19) -0.0038(19) -0.012(2) 
C10 0.029(2) 0.026(2) 0.024(2) 0.0077(18) -0.0131(18) -0.0069(18) 
C11 0.029(2) 0.024(2) 0.028(2) 0.0033(17) -0.0133(19) -0.0099(18) 
C12 0.029(2) 0.023(2) 0.029(2) 0.0054(18) -0.0113(19) -0.0061(18) 
Cl1 0.0263(5) 0.0306(6) 0.0181(5) 0.0010(4) -0.0051(4) -0.0067(4) 
P1 0.0210(5) 0.0220(5) 0.0197(5) 0.0029(4) -0.0079(4) -0.0066(4) 
C11A 0.022(2) 0.025(2) 0.020(2) 0.0028(17) -0.0102(17) -0.0051(17) 
C12A 0.021(2) 0.025(2) 0.030(2) 0.0055(18) -0.0084(18) -0.0064(17) 
F12A 0.0399(15) 0.0295(14) 0.0338(14) 0.0057(11) -0.0180(12) -0.0166(11) 
C13A 0.029(2) 0.034(3) 0.027(2) -0.0019(19) -0.0120(19) -0.008(2) 
F13A 0.0534(17) 0.0377(15) 0.0329(14) -0.0012(12) -0.0233(13) -0.0171(13) 
C14A 0.024(2) 0.039(3) 0.020(2) 0.0012(19) -0.0105(18) -0.0002(19) 
F14A 0.0438(16) 0.0481(16) 0.0230(13) 0.0037(12) -0.0163(12) -0.0103(13) 
C15A 0.024(2) 0.025(2) 0.028(2) 0.0087(18) -0.0113(18) -0.0044(18) 
F15A 0.0361(14) 0.0330(14) 0.0280(13) 0.0103(11) -0.0164(11) -0.0068(11) 
C16A 0.0148(19) 0.026(2) 0.025(2) 0.0009(17) -0.0070(17) -0.0029(16) 
C11B 0.020(2) 0.033(2) 0.021(2) 0.0007(18) -0.0052(17) -0.0104(18) 
C12B 0.031(2) 0.033(3) 0.033(2) -0.002(2) -0.013(2) -0.011(2) 
F12B 0.0288(14) 0.0418(16) 0.0449(16) 0.0086(13) -0.0085(12) -0.0029(12) 
C13B 0.026(3) 0.050(3) 0.039(3) -0.006(2) -0.010(2) -0.004(2) 
F13B 0.0265(15) 0.076(2) 0.0588(19) -0.0009(17) -0.0117(14) 0.0035(15) 
C14B 0.024(3) 0.075(4) 0.031(3) -0.006(3) -0.003(2) -0.016(3) 
F14B 0.0260(15) 0.111(3) 0.0437(17) 0.0041(18) 0.0011(13) -0.0200(17) 
C15B 0.040(3) 0.058(3) 0.024(2) 0.007(2) -0.005(2) -0.028(3) 
F15B 0.0466(18) 0.080(2) 0.0438(17) 0.0214(16) -0.0051(14) -0.0341(17) 
C16B 0.030(2) 0.042(3) 0.026(2) 0.000(2) -0.010(2) -0.012(2) 
F16B 0.0391(15) 0.0433(16) 0.0327(14) 0.0134(12) -0.0107(12) -0.0148(13) 
P2 0.0226(5) 0.0238(6) 0.0224(5) 0.0023(4) -0.0093(4) -0.0048(4) 
C21A 0.028(2) 0.021(2) 0.029(2) 0.0052(17) -0.0134(19) -0.0077(18) 
C22A 0.030(2) 0.027(2) 0.033(2) 0.0043(19) -0.013(2) -0.0072(19) 
F22A 0.0360(15) 0.0488(16) 0.0335(14) -0.0054(12) -0.0129(12) -0.0130(13) 
C23A 0.036(3) 0.028(2) 0.025(2) 0.0016(19) -0.005(2) -0.006(2) 
F23A 0.0428(16) 0.0519(18) 0.0366(16) -0.0125(13) -0.0032(13) -0.0117(14) 
C24A 0.020(2) 0.034(3) 0.039(3) 0.002(2) 0.001(2) -0.0015(19) 
F24A 0.0261(14) 0.0493(17) 0.0537(18) -0.0025(14) -0.0032(13) -0.0040(13) 
C25A 0.024(2) 0.029(2) 0.040(3) 0.003(2) -0.013(2) -0.0069(19) 
F25A 0.0283(14) 0.0548(18) 0.0565(18) -0.0057(14) -0.0168(13) -0.0102(13) 
C26A 0.033(2) 0.025(2) 0.029(2) 0.0017(18) -0.010(2) -0.0047(19) 
F26A 0.0321(14) 0.0419(16) 0.0355(15) -0.0057(12) -0.0132(12) -0.0071(12) 
C21B 0.020(2) 0.031(2) 0.026(2) 0.0039(18) -0.0113(18) -0.0048(18) 
C22B 0.029(2) 0.031(2) 0.029(2) 0.0037(19) -0.0146(19) -0.0078(19) 
F22B 0.0454(16) 0.0299(14) 0.0345(14) 0.0006(11) -0.0215(12) -0.0104(12) 
C23B 0.034(3) 0.044(3) 0.033(3) 0.001(2) -0.017(2) -0.009(2) 
F23B 0.065(2) 0.0586(19) 0.0336(15) -0.0075(14) -0.0242(14) -0.0156(16) 
C24B 0.029(2) 0.057(3) 0.022(2) 0.007(2) -0.010(2) -0.008(2) 
F24B 0.0541(18) 0.081(2) 0.0263(14) 0.0134(14) -0.0202(14) -0.0173(16) 
C25B 0.024(2) 0.038(3) 0.032(2) 0.017(2) -0.012(2) -0.004(2) 
F25B 0.0410(16) 0.0473(17) 0.0407(16) 0.0226(13) -0.0176(13) -0.0052(13) 
C26B 0.021(2) 0.029(2) 0.029(2) 0.0031(19) -0.0087(18) -0.0046(18) 
F26B 0.0408(15) 0.0266(14) 0.0385(15) 0.0051(11) -0.0177(12) -0.0036(11) 
B1 0.039(3) 0.033(3) 0.049(4) 0.002(3) -0.002(3) -0.014(3) 
F24 0.061(2) 0.0434(19) 0.116(3) 0.0352(19) -0.012(2) -0.0180(16) 
F23 0.059(2) 0.081(3) 0.094(3) -0.029(2) 0.017(2) -0.027(2) 
F22 0.081(3) 0.073(2) 0.109(3) 0.044(2) -0.048(2) -0.037(2) 
F21 0.0348(17) 0.0527(19) 0.077(2) -0.0088(16) -0.0016(16) -0.0091(14) 
C1S 0.041(3) 0.040(3) 0.032(3) -0.006(2) -0.014(2) -0.002(2) 
Cl1S 0.1266(15) 0.0380(8) 0.0548(9) 0.0111(7) -0.0382(9) -0.0284(9) 
Cl2S 0.0533(9) 0.0805(11) 0.0462(8) -0.0247(8) -0.0116(7) 0.0073(8) 
Cl3S 0.0442(7) 0.0365(7) 0.0426(7) 0.0012(5) -0.0141(6) -0.0074(5) 
C2S 0.039(3) 0.024(2) 0.048(3) 0.004(2) -0.011(2) -0.009(2) 
Cl4S 0.0595(8) 0.0351(7) 0.0570(8) 0.0071(6) -0.0323(7) -0.0063(6) 
Cl5S 0.0744(10) 0.0423(8) 0.0482(8) 0.0124(6) -0.0172(7) -0.0145(7) 
Cl6S 0.0398(8) 0.0424(9) 0.1650(18) 0.0023(10) -0.0228(10) -0.0128(7) 
  
_geom_special_details 
; 
 All esds (except the esd in the dihedral angle between two l.s. planes) 
 are estimated using the full covariance matrix.  The cell esds are taken 
 into account individually in the estimation of esds in distances, angles 
 and torsion angles; correlations between esds in cell parameters are only 
 used when they are defined by crystal symmetry.  An approximate (isotropic) 
 treatment of cell esds is used for estimating esds involving l.s. planes. 
; 
  
loop_ 
 _geom_bond_atom_site_label_1 
 _geom_bond_atom_site_label_2 
 _geom_bond_distance 
 _geom_bond_site_symmetry_2 
 _geom_bond_publ_flag 
Rh1 C1 2.159(4) . ? 
Rh1 C4 2.163(4) . ? 
Rh1 C5 2.184(4) . ? 
Rh1 C2 2.256(4) . ? 
Rh1 C3 2.270(4) . ? 
Rh1 P1 2.2726(11) . ? 
Rh1 P2 2.3306(11) . ? 
Rh1 Cl1 2.3879(10) . ? 
C1 C5 1.421(5) . ? 
C1 C4 1.422(5) . ? 
C1 C10 1.505(5) . ? 
C2 C3 1.412(6) . ? 
C2 C5 1.444(5) . ? 
C2 C7 1.488(6) . ? 
C3 C4 1.453(5) . ? 
C3 C8 1.490(6) . ? 
C4 C9 1.494(5) . ? 
C5 C6 1.491(6) . ? 
C10 C16A 1.515(5) . ? 
C11 C12 1.521(5) . ? 
C11 P1 1.831(4) . ? 
C12 P2 1.847(4) . ? 
P1 C11A 1.825(4) . ? 
P1 C11B 1.831(4) . ? 
C11A C12A 1.388(5) . ? 
C11A C16A 1.412(5) . ? 
C12A F12A 1.341(4) . ? 
C12A C13A 1.383(6) . ? 
C13A F13A 1.331(5) . ? 
C13A C14A 1.373(6) . ? 
C14A F14A 1.337(4) . ? 
C14A C15A 1.374(6) . ? 
C15A F15A 1.355(4) . ? 
C15A C16A 1.383(5) . ? 
C11B C12B 1.389(6) . ? 
C11B C16B 1.390(6) . ? 
C12B F12B 1.343(5) . ? 
C12B C13B 1.370(6) . ? 
C13B F13B 1.343(5) . ? 
C13B C14B 1.366(7) . ? 
C14B F14B 1.338(5) . ? 
C14B C15B 1.378(7) . ? 
C15B F15B 1.341(5) . ? 
C15B C16B 1.385(6) . ? 
C16B F16B 1.340(5) . ? 
P2 C21A 1.837(4) . ? 
P2 C21B 1.838(4) . ? 
C21A C26A 1.383(6) . ? 
C21A C22A 1.396(6) . ? 
C22A F22A 1.342(5) . ? 
C22A C23A 1.387(6) . ? 
C23A F23A 1.334(5) . ? 
C23A C24A 1.381(6) . ? 
C24A F24A 1.328(5) . ? 
C24A C25A 1.360(6) . ? 
C25A F25A 1.348(5) . ? 
C25A C26A 1.377(6) . ? 
C26A F26A 1.353(5) . ? 
C21B C22B 1.388(6) . ? 
C21B C26B 1.398(5) . ? 
C22B F22B 1.336(5) . ? 
C22B C23B 1.387(6) . ? 
C23B F23B 1.333(5) . ? 
C23B C24B 1.369(6) . ? 
C24B F24B 1.337(5) . ? 
C24B C25B 1.349(6) . ? 
C25B F25B 1.361(5) . ? 
C25B C26B 1.378(6) . ? 
C26B F26B 1.339(5) . ? 
B1 F24 1.349(6) . ? 
B1 F23 1.354(6) . ? 
B1 F21 1.380(6) . ? 
B1 F22 1.386(7) . ? 
C1S Cl3S 1.742(5) . ? 
C1S Cl2S 1.752(4) . ? 
C1S Cl1S 1.764(5) . ? 
C2S Cl6S 1.750(5) . ? 
C2S Cl5S 1.754(5) . ? 
C2S Cl4S 1.763(5) . ? 
  
loop_ 
 _geom_angle_atom_site_label_1 
 _geom_angle_atom_site_label_2 
 _geom_angle_atom_site_label_3 
 _geom_angle 
 _geom_angle_site_symmetry_1 
 _geom_angle_site_symmetry_3 
 _geom_angle_publ_flag 
C1 Rh1 C4 38.42(15) . . ? 
C1 Rh1 C5 38.19(14) . . ? 
C4 Rh1 C5 64.32(15) . . ? 
C1 Rh1 C2 63.01(14) . . ? 
C4 Rh1 C2 63.15(15) . . ? 
C5 Rh1 C2 37.93(14) . . ? 
C1 Rh1 C3 62.98(14) . . ? 
C4 Rh1 C3 38.18(14) . . ? 
C5 Rh1 C3 62.67(15) . . ? 
C2 Rh1 C3 36.35(14) . . ? 
C1 Rh1 P1 90.20(10) . . ? 
C4 Rh1 P1 106.86(11) . . ? 
C5 Rh1 P1 110.46(11) . . ? 
C2 Rh1 P1 148.34(11) . . ? 
C3 Rh1 P1 144.98(11) . . ? 
C1 Rh1 P2 143.78(11) . . ? 
C4 Rh1 P2 108.72(11) . . ? 
C5 Rh1 P2 162.12(11) . . ? 
C2 Rh1 P2 124.32(11) . . ? 
C3 Rh1 P2 101.29(11) . . ? 
P1 Rh1 P2 87.18(4) . . ? 
C1 Rh1 Cl1 128.32(11) . . ? 
C4 Rh1 Cl1 157.72(11) . . ? 
C5 Rh1 Cl1 95.45(11) . . ? 
C2 Rh1 Cl1 95.34(11) . . ? 
C3 Rh1 Cl1 125.52(11) . . ? 
P1 Rh1 Cl1 88.38(4) . . ? 
P2 Rh1 Cl1 87.73(4) . . ? 
C5 C1 C4 109.0(3) . . ? 
C5 C1 C10 124.8(4) . . ? 
C4 C1 C10 125.6(4) . . ? 
C5 C1 Rh1 71.9(2) . . ? 
C4 C1 Rh1 71.0(2) . . ? 
C10 C1 Rh1 130.2(3) . . ? 
C3 C2 C5 108.5(4) . . ? 
C3 C2 C7 127.2(4) . . ? 
C5 C2 C7 124.1(4) . . ? 
C3 C2 Rh1 72.4(2) . . ? 
C5 C2 Rh1 68.3(2) . . ? 
C7 C2 Rh1 130.2(3) . . ? 
C2 C3 C4 107.8(4) . . ? 
C2 C3 C8 127.3(4) . . ? 
C4 C3 C8 124.6(4) . . ? 
C2 C3 Rh1 71.3(2) . . ? 
C4 C3 Rh1 66.9(2) . . ? 
C8 C3 Rh1 132.6(3) . . ? 
C1 C4 C3 107.2(4) . . ? 
C1 C4 C9 126.1(4) . . ? 
C3 C4 C9 125.6(4) . . ? 
C1 C4 Rh1 70.6(2) . . ? 
C3 C4 Rh1 74.9(2) . . ? 
C9 C4 Rh1 129.3(3) . . ? 
C1 C5 C2 107.4(4) . . ? 
C1 C5 C6 128.1(4) . . ? 
C2 C5 C6 124.3(4) . . ? 
C1 C5 Rh1 70.0(2) . . ? 
C2 C5 Rh1 73.7(2) . . ? 
C6 C5 Rh1 126.2(3) . . ? 
C1 C10 C16A 120.2(3) . . ? 
C12 C11 P1 113.0(3) . . ? 
C11 C12 P2 112.9(3) . . ? 
C11A P1 C11B 102.86(18) . . ? 
C11A P1 C11 103.83(18) . . ? 
C11B P1 C11 107.12(19) . . ? 
C11A P1 Rh1 116.98(13) . . ? 
C11B P1 Rh1 116.49(13) . . ? 
C11 P1 Rh1 108.48(13) . . ? 
C12A C11A C16A 117.5(3) . . ? 
C12A C11A P1 119.0(3) . . ? 
C16A C11A P1 123.5(3) . . ? 
F12A C12A C13A 116.1(4) . . ? 
F12A C12A C11A 120.3(4) . . ? 
C13A C12A C11A 123.6(4) . . ? 
F13A C13A C14A 121.0(4) . . ? 
F13A C13A C12A 120.8(4) . . ? 
C14A C13A C12A 118.2(4) . . ? 
F14A C14A C13A 120.3(4) . . ? 
F14A C14A C15A 120.3(4) . . ? 
C13A C14A C15A 119.4(4) . . ? 
F15A C15A C14A 116.9(3) . . ? 
F15A C15A C16A 119.8(4) . . ? 
C14A C15A C16A 123.3(4) . . ? 
C15A C16A C11A 117.9(4) . . ? 
C15A C16A C10 115.7(3) . . ? 
C11A C16A C10 126.0(3) . . ? 
C12B C11B C16B 114.8(4) . . ? 
C12B C11B P1 120.9(3) . . ? 
C16B C11B P1 124.1(3) . . ? 
F12B C12B C13B 117.0(4) . . ? 
F12B C12B C11B 119.3(4) . . ? 
C13B C12B C11B 123.6(4) . . ? 
F13B C13B C14B 119.7(4) . . ? 
F13B C13B C12B 120.4(4) . . ? 
C14B C13B C12B 119.8(4) . . ? 
F14B C14B C13B 120.3(5) . . ? 
F14B C14B C15B 120.3(5) . . ? 
C13B C14B C15B 119.3(4) . . ? 
F15B C15B C14B 120.8(4) . . ? 
F15B C15B C16B 119.5(5) . . ? 
C14B C15B C16B 119.7(4) . . ? 
F16B C16B C15B 116.1(4) . . ? 
F16B C16B C11B 121.2(4) . . ? 
C15B C16B C11B 122.7(4) . . ? 
C21A P2 C21B 101.88(18) . . ? 
C21A P2 C12 106.42(19) . . ? 
C21B P2 C12 102.28(18) . . ? 
C21A P2 Rh1 121.14(13) . . ? 
C21B P2 Rh1 117.15(14) . . ? 
C12 P2 Rh1 106.07(13) . . ? 
C26A C21A C22A 114.4(4) . . ? 
C26A C21A P2 122.3(3) . . ? 
C22A C21A P2 123.2(3) . . ? 
F22A C22A C23A 116.0(4) . . ? 
F22A C22A C21A 120.5(4) . . ? 
C23A C22A C21A 123.4(4) . . ? 
F23A C23A C24A 120.8(4) . . ? 
F23A C23A C22A 120.1(4) . . ? 
C24A C23A C22A 119.1(4) . . ? 
F24A C24A C25A 121.2(4) . . ? 
F24A C24A C23A 119.7(4) . . ? 
C25A C24A C23A 119.0(4) . . ? 
F25A C25A C24A 119.8(4) . . ? 
F25A C25A C26A 119.5(4) . . ? 
C24A C25A C26A 120.8(4) . . ? 
F26A C26A C25A 116.9(4) . . ? 
F26A C26A C21A 120.0(4) . . ? 
C25A C26A C21A 123.2(4) . . ? 
C22B C21B C26B 115.2(4) . . ? 
C22B C21B P2 121.4(3) . . ? 
C26B C21B P2 123.2(3) . . ? 
F22B C22B C23B 116.7(4) . . ? 
F22B C22B C21B 120.4(4) . . ? 
C23B C22B C21B 122.9(4) . . ? 
F23B C23B C24B 120.9(4) . . ? 
F23B C23B C22B 119.8(4) . . ? 
C24B C23B C22B 119.3(4) . . ? 
F24B C24B C25B 120.4(4) . . ? 
F24B C24B C23B 120.0(4) . . ? 
C25B C24B C23B 119.6(4) . . ? 
C24B C25B F25B 120.7(4) . . ? 
C24B C25B C26B 121.1(4) . . ? 
F25B C25B C26B 118.1(4) . . ? 
F26B C26B C25B 117.9(4) . . ? 
F26B C26B C21B 120.3(4) . . ? 
C25B C26B C21B 121.8(4) . . ? 
F24 B1 F23 114.4(5) . . ? 
F24 B1 F21 112.4(5) . . ? 
F23 B1 F21 110.7(5) . . ? 
F24 B1 F22 105.4(5) . . ? 
F23 B1 F22 104.6(5) . . ? 
F21 B1 F22 108.7(5) . . ? 
Cl3S C1S Cl2S 109.8(2) . . ? 
Cl3S C1S Cl1S 110.2(3) . . ? 
Cl2S C1S Cl1S 109.5(3) . . ? 
Cl6S C2S Cl5S 108.4(3) . . ? 
Cl6S C2S Cl4S 110.5(2) . . ? 
Cl5S C2S Cl4S 109.9(3) . . ? 
  
_diffrn_measured_fraction_theta_max    0.868 
_diffrn_reflns_theta_full              28.73 
_diffrn_measured_fraction_theta_full   0.868 
_refine_diff_density_max    1.182 
_refine_diff_density_min   -1.015 
_refine_diff_density_rms    0.127 
  
#===END

data_Compound 8
  
_audit_creation_method            SHELXL-97 
_chemical_name_systematic 
; 
 ? 
; 
_chemical_name_common             ? 
_chemical_melting_point           ? 
_chemical_formula_moiety          ? 
_chemical_formula_sum 
 'C32 H24 B Cl10 F13 P Rh S' 
_chemical_formula_weight          1186.76 
  
loop_ 
 _atom_type_symbol 
 _atom_type_description 
 _atom_type_scat_dispersion_real 
 _atom_type_scat_dispersion_imag 
 _atom_type_scat_source 
 'C'  'C'   0.0033   0.0016 
 'International Tables Vol C Tables 4.2.6.8 and 6.1.1.4' 
 'H'  'H'   0.0000   0.0000 
 'International Tables Vol C Tables 4.2.6.8 and 6.1.1.4' 
 'B'  'B'   0.0013   0.0007 
 'International Tables Vol C Tables 4.2.6.8 and 6.1.1.4' 
 'F'  'F'   0.0171   0.0103 
 'International Tables Vol C Tables 4.2.6.8 and 6.1.1.4' 
 'P'  'P'   0.1023   0.0942 
 'International Tables Vol C Tables 4.2.6.8 and 6.1.1.4' 
 'S'  'S'   0.1246   0.1234 
 'International Tables Vol C Tables 4.2.6.8 and 6.1.1.4' 
 'Cl'  'Cl'   0.1484   0.1585 
 'International Tables Vol C Tables 4.2.6.8 and 6.1.1.4' 
 'Rh'  'Rh'  -1.1178   0.9187 
 'International Tables Vol C Tables 4.2.6.8 and 6.1.1.4' 
  
_symmetry_cell_setting            Triclinic 
_symmetry_space_group_name_H-M    P-1 
  
loop_ 
 _symmetry_equiv_pos_as_xyz 
 'x, y, z' 
 '-x, -y, -z' 
  
_cell_length_a                    11.6484(9) 
_cell_length_b                    11.7516(10) 
_cell_length_c                    17.7351(14) 
_cell_angle_alpha                 93.233(2) 
_cell_angle_beta                  102.5490(10) 
_cell_angle_gamma                 112.3060(10) 
_cell_volume                      2166.3(3) 
_cell_formula_units_Z             2 
_cell_measurement_temperature     153(2) 
_cell_measurement_reflns_used     ? 
_cell_measurement_theta_min       ? 
_cell_measurement_theta_max       ? 
  
_exptl_crystal_description        'thick plate' 
_exptl_crystal_colour             yellow 
_exptl_crystal_size_max           0.48 
_exptl_crystal_size_mid           0.31 
_exptl_crystal_size_min           0.19 
_exptl_crystal_density_meas       not_measured 
_exptl_crystal_density_diffrn     1.819 
_exptl_crystal_density_method     'not measured' 
_exptl_crystal_F_000              1168 
_exptl_absorpt_coefficient_mu     1.179 
_exptl_absorpt_correction_type    Empirical 
_exptl_absorpt_correction_T_min   0.6015 
_exptl_absorpt_correction_T_max   0.8070 
_exptl_absorpt_process_details    'SADABS (Bruker 1998)' 
  
_exptl_special_details 
; 
 ? 
; 
  
_diffrn_ambient_temperature       153(2) 
_diffrn_radiation_wavelength      0.71073 
_diffrn_radiation_type            MoK\a 
_diffrn_radiation_source          'fine-focus sealed tube' 
_diffrn_radiation_monochromator   graphite 
_diffrn_measurement_device_type   'CCD area detector' 
_diffrn_measurement_method        'phi and omega scans' 
_diffrn_detector_area_resol_mean  ? 
_diffrn_standards_number          ? 
_diffrn_standards_interval_count  ? 
_diffrn_standards_interval_time   ? 
_diffrn_standards_decay_%         ? 
_diffrn_reflns_number             14538 
_diffrn_reflns_av_R_equivalents   0.0521 
_diffrn_reflns_av_sigmaI/netI     0.0836 
_diffrn_reflns_limit_h_min        -14 
_diffrn_reflns_limit_h_max        15 
_diffrn_reflns_limit_k_min        -15 
_diffrn_reflns_limit_k_max        14 
_diffrn_reflns_limit_l_min        -23 
_diffrn_reflns_limit_l_max        23 
_diffrn_reflns_theta_min          1.19 
_diffrn_reflns_theta_max          28.66 
_reflns_number_total              8998 
_reflns_number_gt                 6357 
_reflns_threshold_expression      >2sigma(I) 
  
_computing_data_collection        'Bruker SMART' 
_computing_cell_refinement        'Bruker SMART' 
_computing_data_reduction         'Bruker SHELXTL' 
_computing_structure_solution     'SHELXS-97 (Sheldrick, 1990)' 
_computing_structure_refinement   'SHELXL-97 (Sheldrick, 1997)' 
_computing_molecular_graphics     'Bruker SHELXTL' 
_computing_publication_material   'Bruker SHELXTL' 
  
_refine_special_details 
; 
 Refinement of F^2^ against ALL reflections.  The weighted R-factor wR and 
 goodness of fit S are based on F^2^, conventional R-factors R are based 
 on F, with F set to zero for negative F^2^. The threshold expression of 
 F^2^ > 2sigma(F^2^) is used only for calculating R-factors(gt) etc. and is 
 not relevant to the choice of reflections for refinement.  R-factors based 
 on F^2^ are statistically about twice as large as those based on F, and R- 
 factors based on ALL data will be even larger. 
; 
  
_refine_ls_structure_factor_coef  Fsqd 
_refine_ls_matrix_type            full 
_refine_ls_weighting_scheme       calc 
_refine_ls_weighting_details 
 'calc w=1/[\s^2^(Fo^2^)+(0.0603P)^2^+0.0000P] where P=(Fo^2^+2Fc^2^)/3' 
_atom_sites_solution_primary      direct 
_atom_sites_solution_secondary    difmap 
_atom_sites_solution_hydrogens    geom 
_refine_ls_hydrogen_treatment     calc 
_refine_ls_extinction_method      none 
_refine_ls_extinction_coef        ? 
_refine_ls_number_reflns          8998 
_refine_ls_number_parameters      574 
_refine_ls_number_restraints      0 
_refine_ls_R_factor_all           0.0701 
_refine_ls_R_factor_gt            0.0470 
_refine_ls_wR_factor_ref          0.1204 
_refine_ls_wR_factor_gt           0.1100 
_refine_ls_goodness_of_fit_ref    0.935 
_refine_ls_restrained_S_all       0.935 
_refine_ls_shift/su_max           0.001 
_refine_ls_shift/su_mean          0.000 
  
loop_ 
 _atom_site_label 
 _atom_site_type_symbol 
 _atom_site_fract_x 
 _atom_site_fract_y 
 _atom_site_fract_z 
 _atom_site_U_iso_or_equiv 
 _atom_site_adp_type 
 _atom_site_occupancy 
 _atom_site_symmetry_multiplicity 
 _atom_site_calc_flag 
 _atom_site_refinement_flags 
 _atom_site_disorder_assembly 
 _atom_site_disorder_group 
Rh1 Rh -0.11069(3) 0.31164(3) -0.264622(18) 0.02170(10) Uani 1 1 d . . . 
P1 P -0.22216(9) 0.13667(9) -0.22151(6) 0.0215(2) Uani 1 1 d . . . 
Cl1 Cl -0.04188(10) 0.20456(10) -0.35050(6) 0.0340(2) Uani 1 1 d . . . 
C1 C -0.2496(4) 0.3867(4) -0.2586(2) 0.0268(9) Uani 1 1 d . . . 
C2 C -0.2531(4) 0.3618(4) -0.3388(2) 0.0300(9) Uani 1 1 d . . . 
C3 C -0.1300(4) 0.4423(4) -0.3490(3) 0.0318(10) Uani 1 1 d . . . 
C4 C -0.0511(4) 0.5115(4) -0.2765(3) 0.0295(9) Uani 1 1 d . . . 
C5 C -0.1244(4) 0.4790(4) -0.2191(2) 0.0279(9) Uani 1 1 d . . . 
C6 C -0.3594(4) 0.3394(4) -0.2217(3) 0.0351(10) Uani 1 1 d . . . 
H6A H -0.4207 0.3759 -0.2442 0.042 Uiso 1 1 calc R . . 
H6B H -0.3252 0.3747 -0.1655 0.042 Uiso 1 1 calc R . . 
C7 C -0.3675(4) 0.2816(4) -0.4039(3) 0.0384(11) Uani 1 1 d . . . 
H7A H -0.4334 0.2244 -0.3819 0.058 Uiso 1 1 calc R . . 
H7B H -0.3415 0.2338 -0.4387 0.058 Uiso 1 1 calc R . . 
H7C H -0.4024 0.3344 -0.4335 0.058 Uiso 1 1 calc R . . 
C8 C -0.0956(5) 0.4496(5) -0.4260(3) 0.0448(12) Uani 1 1 d . . . 
H8A H -0.1324 0.5010 -0.4558 0.067 Uiso 1 1 calc R . . 
H8B H -0.1301 0.3657 -0.4557 0.067 Uiso 1 1 calc R . . 
H8C H -0.0020 0.4869 -0.4168 0.067 Uiso 1 1 calc R . . 
C9 C 0.0835(4) 0.6086(4) -0.2602(3) 0.0392(11) Uani 1 1 d . . . 
H9A H 0.1253 0.5908 -0.2990 0.059 Uiso 1 1 calc R . . 
H9B H 0.1318 0.6077 -0.2078 0.059 Uiso 1 1 calc R . . 
H9C H 0.0812 0.6908 -0.2632 0.059 Uiso 1 1 calc R . . 
C10 C -0.0808(4) 0.5396(4) -0.1361(3) 0.0393(11) Uani 1 1 d . . . 
H10A H 0.0126 0.5681 -0.1178 0.059 Uiso 1 1 calc R . . 
H10B H -0.1220 0.4796 -0.1040 0.059 Uiso 1 1 calc R . . 
H10C H -0.1044 0.6109 -0.1320 0.059 Uiso 1 1 calc R . . 
C1A C -0.1401(4) 0.1472(4) -0.1201(2) 0.0254(9) Uani 1 1 d . . . 
C2A C -0.1940(4) 0.0677(4) -0.0698(2) 0.0329(10) Uani 1 1 d . . . 
H2A H -0.2806 0.0087 -0.0860 0.039 Uiso 1 1 calc R . . 
C3A C -0.1184(5) 0.0767(5) 0.0042(3) 0.0415(12) Uani 1 1 d . . . 
H3A H -0.1545 0.0227 0.0386 0.050 Uiso 1 1 calc R . . 
C4A C 0.0056(5) 0.1602(4) 0.0291(3) 0.0404(11) Uani 1 1 d . . . 
H4A H 0.0551 0.1632 0.0799 0.048 Uiso 1 1 calc R . . 
C5A C 0.0603(4) 0.2415(4) -0.0197(2) 0.0365(11) Uani 1 1 d . . . 
H5A H 0.1466 0.3010 -0.0024 0.044 Uiso 1 1 calc R . . 
C6A C -0.0135(4) 0.2338(4) -0.0941(2) 0.0267(9) Uani 1 1 d . . . 
S7A S 0.05895(9) 0.34010(10) -0.15554(6) 0.0301(2) Uani 1 1 d . . . 
C8A C 0.1745(4) 0.2837(5) -0.1758(3) 0.0498(14) Uani 1 1 d . . . 
H8A1 H 0.2324 0.2840 -0.1265 0.075 Uiso 1 1 calc R . . 
H8A2 H 0.2245 0.3378 -0.2075 0.075 Uiso 1 1 calc R . . 
H8A3 H 0.1297 0.1987 -0.2045 0.075 Uiso 1 1 calc R . . 
C11 C -0.2279(3) -0.0050(3) -0.2731(2) 0.0213(8) Uani 1 1 d . . . 
F12 F -0.0543(2) -0.0169(2) -0.17854(14) 0.0389(6) Uani 1 1 d . . . 
C12 C -0.1436(4) -0.0616(4) -0.2474(2) 0.0264(9) Uani 1 1 d . . . 
F13 F -0.0673(3) -0.2171(3) -0.26145(16) 0.0464(7) Uani 1 1 d . . . 
C13 C -0.1468(4) -0.1637(4) -0.2904(3) 0.0305(9) Uani 1 1 d . . . 
F14 F -0.2335(2) -0.3106(2) -0.40455(16) 0.0478(7) Uani 1 1 d . . . 
C14 C -0.2308(4) -0.2113(4) -0.3622(3) 0.0310(10) Uani 1 1 d . . . 
F15 F -0.3942(2) -0.2003(2) -0.46303(14) 0.0429(6) Uani 1 1 d . . . 
C15 C -0.3126(4) -0.1554(4) -0.3921(2) 0.0310(10) Uani 1 1 d . . . 
F16 F -0.3902(2) -0.0019(2) -0.37809(13) 0.0353(6) Uani 1 1 d . . . 
C16 C -0.3095(4) -0.0555(4) -0.3475(2) 0.0271(9) Uani 1 1 d . . . 
C21 C -0.3883(3) 0.1061(4) -0.2226(2) 0.0252(9) Uani 1 1 d . . . 
C22 C -0.4371(4) 0.2005(4) -0.2268(2) 0.0291(9) Uani 1 1 d . . . 
F23 F -0.6138(2) 0.2548(3) -0.23218(18) 0.0503(7) Uani 1 1 d . . . 
C23 C -0.5648(4) 0.1674(4) -0.2276(3) 0.0361(10) Uani 1 1 d . . . 
C24 C -0.6456(4) 0.0479(5) -0.2230(3) 0.0399(11) Uani 1 1 d . . . 
F24 F -0.7672(2) 0.0230(3) -0.2222(2) 0.0592(8) Uani 1 1 d . . . 
F25 F -0.6741(2) -0.1574(2) -0.21201(17) 0.0513(7) Uani 1 1 d . . . 
C25 C -0.5990(4) -0.0414(4) -0.2176(3) 0.0381(11) Uani 1 1 d . . . 
F26 F -0.4334(2) -0.1057(2) -0.21158(15) 0.0390(6) Uani 1 1 d . . . 
C26 C -0.4723(4) -0.0121(4) -0.2177(2) 0.0295(9) Uani 1 1 d . . . 
C1S C 0.3805(4) 0.5478(4) -0.3531(3) 0.0372(11) Uani 1 1 d . . . 
H1S H 0.4357 0.5658 -0.2984 0.045 Uiso 1 1 calc R . . 
Cl11 Cl 0.45826(16) 0.50703(15) -0.41703(10) 0.0727(5) Uani 1 1 d . . . 
Cl12 Cl 0.23235(12) 0.42334(12) -0.35930(8) 0.0493(3) Uani 1 1 d . . . 
Cl13 Cl 0.35510(12) 0.68174(12) -0.37584(7) 0.0459(3) Uani 1 1 d . . . 
C2S C 0.1646(5) -0.0559(5) -0.4559(3) 0.0443(12) Uani 1 1 d . . . 
H2S H 0.1268 -0.0747 -0.5138 0.053 Uiso 1 1 calc R . . 
Cl21 Cl 0.16522(17) 0.08688(16) -0.42187(10) 0.0755(5) Uani 1 1 d . . . 
Cl22 Cl 0.07230(16) -0.17578(17) -0.41398(11) 0.0800(5) Uani 1 1 d . . . 
Cl23 Cl 0.32298(12) -0.04646(13) -0.43692(8) 0.0527(3) Uani 1 1 d . . . 
C3S C -0.5604(5) -0.2691(5) -0.0290(3) 0.0540(14) Uani 1 1 d . . . 
H3S H -0.5480 -0.2927 -0.0808 0.065 Uiso 1 1 calc R A 1 
Cl31 Cl -0.6882(4) -0.2274(4) -0.0347(2) 0.0764(11) Uani 0.567(5) 1 d P B 2 
Cl32 Cl -0.4149(3) -0.1576(4) 0.0183(2) 0.0971(16) Uani 0.567(5) 1 d P B 2 
Cl33 Cl -0.5898(5) -0.4058(3) 0.0131(2) 0.0828(14) Uani 0.567(5) 1 d P B 2 
Cl3' Cl -0.7225(4) -0.3280(8) -0.0292(3) 0.117(2) Uani 0.433(5) 1 d P B 1 
Cl3" Cl -0.4835(6) -0.3269(6) 0.0463(2) 0.094(2) Uani 0.433(5) 1 d P B 1 
Cl3# Cl -0.4990(7) -0.1043(4) -0.0021(3) 0.106(2) Uani 0.433(5) 1 d P . 1 
B1 B -0.3652(5) 0.6508(5) -0.1590(4) 0.0463(15) Uani 1 1 d . . . 
F1 F -0.3278(3) 0.5812(3) -0.10701(17) 0.0545(8) Uani 1 1 d . B . 
F2 F -0.3425(3) 0.6215(4) -0.2294(2) 0.0789(11) Uani 1 1 d . B . 
F3 F -0.4956(3) 0.6200(4) -0.17169(18) 0.0715(10) Uani 1 1 d . B . 
F4 F -0.2824(7) 0.7764(7) -0.1428(4) 0.0497(17) Uani 0.567(5) 1 d P B 2 
F4' F -0.3224(10) 0.7652(9) -0.1065(7) 0.072(3) Uani 0.433(5) 1 d P B 1 
  
loop_ 
 _atom_site_aniso_label 
 _atom_site_aniso_U_11 
 _atom_site_aniso_U_22 
 _atom_site_aniso_U_33 
 _atom_site_aniso_U_23 
 _atom_site_aniso_U_13 
 _atom_site_aniso_U_12 
Rh1 0.01940(16) 0.02019(17) 0.02641(18) 0.00116(12) 0.00578(12) 0.00932(13) 
P1 0.0188(5) 0.0210(5) 0.0243(5) 0.0015(4) 0.0048(4) 0.0080(4) 
Cl1 0.0395(6) 0.0283(6) 0.0402(6) 0.0022(5) 0.0217(5) 0.0144(5) 
C1 0.024(2) 0.020(2) 0.037(2) -0.0009(18) 0.0038(17) 0.0133(18) 
C2 0.031(2) 0.029(2) 0.036(2) 0.0058(19) 0.0061(18) 0.020(2) 
C3 0.035(2) 0.029(2) 0.039(3) 0.012(2) 0.0094(19) 0.019(2) 
C4 0.027(2) 0.018(2) 0.044(3) 0.0037(19) 0.0085(19) 0.0106(18) 
C5 0.029(2) 0.020(2) 0.037(2) -0.0030(18) 0.0050(18) 0.0150(18) 
C6 0.029(2) 0.032(3) 0.051(3) -0.001(2) 0.018(2) 0.017(2) 
C7 0.030(2) 0.036(3) 0.040(3) 0.002(2) -0.0079(19) 0.013(2) 
C8 0.047(3) 0.052(3) 0.040(3) 0.021(2) 0.015(2) 0.021(3) 
C9 0.028(2) 0.025(2) 0.067(3) 0.010(2) 0.014(2) 0.011(2) 
C10 0.034(2) 0.038(3) 0.044(3) -0.013(2) 0.008(2) 0.015(2) 
C1A 0.027(2) 0.023(2) 0.027(2) 0.0042(17) 0.0077(16) 0.0114(18) 
C2A 0.037(2) 0.031(3) 0.032(2) 0.0060(19) 0.0124(19) 0.012(2) 
C3A 0.057(3) 0.042(3) 0.028(2) 0.010(2) 0.012(2) 0.022(3) 
C4A 0.056(3) 0.042(3) 0.025(2) 0.002(2) 0.003(2) 0.026(3) 
C5A 0.037(2) 0.043(3) 0.027(2) -0.004(2) -0.0030(19) 0.021(2) 
C6A 0.026(2) 0.028(2) 0.029(2) -0.0001(18) 0.0041(17) 0.0147(18) 
S7A 0.0195(5) 0.0313(6) 0.0355(6) 0.0036(5) 0.0017(4) 0.0088(4) 
C8A 0.031(2) 0.077(4) 0.059(3) 0.024(3) 0.018(2) 0.035(3) 
C11 0.0218(19) 0.016(2) 0.024(2) 0.0020(16) 0.0072(15) 0.0052(16) 
F12 0.0387(14) 0.0482(17) 0.0321(14) -0.0008(12) -0.0044(11) 0.0283(13) 
C12 0.026(2) 0.023(2) 0.028(2) 0.0041(17) 0.0044(17) 0.0086(18) 
F13 0.0517(16) 0.0423(17) 0.0579(18) 0.0097(14) 0.0117(14) 0.0336(14) 
C13 0.032(2) 0.026(2) 0.040(3) 0.0057(19) 0.0112(19) 0.018(2) 
F14 0.0479(16) 0.0344(16) 0.0603(18) -0.0127(13) 0.0156(14) 0.0174(14) 
C14 0.032(2) 0.022(2) 0.039(3) -0.0047(19) 0.0160(19) 0.0074(19) 
F15 0.0423(15) 0.0431(16) 0.0314(14) -0.0124(12) -0.0008(11) 0.0125(13) 
C15 0.026(2) 0.029(2) 0.028(2) -0.0012(18) 0.0031(17) 0.0044(19) 
F16 0.0342(13) 0.0393(15) 0.0315(13) 0.0000(11) -0.0025(10) 0.0206(12) 
C16 0.024(2) 0.024(2) 0.032(2) 0.0060(18) 0.0070(17) 0.0088(18) 
C21 0.0188(18) 0.028(2) 0.024(2) -0.0022(17) 0.0052(15) 0.0043(17) 
C22 0.022(2) 0.030(2) 0.033(2) 0.0002(19) 0.0067(17) 0.0099(18) 
F23 0.0302(14) 0.0417(17) 0.085(2) 0.0005(15) 0.0189(14) 0.0199(13) 
C23 0.028(2) 0.041(3) 0.040(3) -0.007(2) 0.0089(19) 0.017(2) 
C24 0.018(2) 0.045(3) 0.049(3) -0.005(2) 0.0083(19) 0.007(2) 
F24 0.0227(13) 0.057(2) 0.096(2) -0.0006(17) 0.0242(15) 0.0104(13) 
F25 0.0358(15) 0.0355(17) 0.072(2) 0.0022(14) 0.0237(14) -0.0011(13) 
C25 0.028(2) 0.031(3) 0.045(3) -0.001(2) 0.014(2) 0.000(2) 
F26 0.0348(14) 0.0293(15) 0.0537(16) 0.0103(12) 0.0167(12) 0.0104(12) 
C26 0.029(2) 0.030(2) 0.030(2) 0.0052(19) 0.0102(18) 0.0105(19) 
C1S 0.034(2) 0.041(3) 0.038(3) 0.006(2) 0.012(2) 0.015(2) 
Cl11 0.0781(10) 0.0656(10) 0.0962(12) 0.0109(9) 0.0579(10) 0.0333(9) 
Cl12 0.0428(7) 0.0407(7) 0.0644(8) 0.0117(6) 0.0196(6) 0.0131(6) 
Cl13 0.0480(7) 0.0406(7) 0.0503(7) 0.0079(6) 0.0147(6) 0.0177(6) 
C2S 0.045(3) 0.046(3) 0.047(3) 0.002(2) 0.012(2) 0.023(3) 
Cl21 0.0878(11) 0.0693(11) 0.0807(11) -0.0143(8) 0.0045(9) 0.0565(10) 
Cl22 0.0728(10) 0.0836(13) 0.0956(13) 0.0363(10) 0.0495(10) 0.0264(9) 
Cl23 0.0457(7) 0.0526(8) 0.0655(9) 0.0081(7) 0.0160(6) 0.0250(6) 
C3S 0.059(3) 0.057(4) 0.048(3) 0.008(3) 0.022(3) 0.021(3) 
Cl31 0.081(2) 0.080(3) 0.089(2) 0.0154(19) 0.0336(18) 0.049(2) 
Cl32 0.072(2) 0.107(3) 0.082(2) 0.018(2) 0.0263(18) -0.001(2) 
Cl33 0.115(3) 0.073(2) 0.095(3) 0.042(2) 0.059(3) 0.053(2) 
Cl3' 0.047(2) 0.145(6) 0.117(4) 0.024(4) 0.003(2) 0.003(3) 
Cl3" 0.113(5) 0.145(5) 0.059(2) 0.023(3) 0.018(3) 0.091(4) 
Cl3# 0.162(6) 0.042(2) 0.124(4) 0.006(2) 0.091(4) 0.024(3) 
B1 0.034(3) 0.032(3) 0.066(4) 0.000(3) -0.003(3) 0.015(3) 
F1 0.0588(18) 0.0468(18) 0.0540(18) 0.0055(14) 0.0031(15) 0.0234(15) 
F2 0.062(2) 0.109(3) 0.076(2) 0.042(2) 0.0325(19) 0.033(2) 
F3 0.0447(17) 0.114(3) 0.0543(19) -0.0133(19) -0.0012(15) 0.0410(19) 
F4 0.051(4) 0.029(3) 0.063(5) 0.005(3) 0.005(3) 0.016(3) 
F4' 0.071(7) 0.033(5) 0.091(9) -0.012(5) -0.012(5) 0.020(5) 
  
_geom_special_details 
; 
 All esds (except the esd in the dihedral angle between two l.s. planes) 
 are estimated using the full covariance matrix.  The cell esds are taken 
 into account individually in the estimation of esds in distances, angles 
 and torsion angles; correlations between esds in cell parameters are only 
 used when they are defined by crystal symmetry.  An approximate (isotropic) 
 treatment of cell esds is used for estimating esds involving l.s. planes. 
; 
  
loop_ 
 _geom_bond_atom_site_label_1 
 _geom_bond_atom_site_label_2 
 _geom_bond_distance 
 _geom_bond_site_symmetry_2 
 _geom_bond_publ_flag 
Rh1 C1 2.134(4) . ? 
Rh1 C5 2.158(4) . ? 
Rh1 C2 2.171(4) . ? 
Rh1 C4 2.219(4) . ? 
Rh1 C3 2.241(4) . ? 
Rh1 P1 2.2540(10) . ? 
Rh1 S7A 2.3502(10) . ? 
Rh1 Cl1 2.3719(11) . ? 
P1 C1A 1.818(4) . ? 
P1 C21 1.825(4) . ? 
P1 C11 1.825(4) . ? 
C1 C2 1.425(6) . ? 
C1 C5 1.436(5) . ? 
C1 C6 1.496(5) . ? 
C2 C3 1.444(6) . ? 
C2 C7 1.500(6) . ? 
C3 C4 1.399(6) . ? 
C3 C8 1.504(6) . ? 
C4 C5 1.444(6) . ? 
C4 C9 1.500(5) . ? 
C5 C10 1.488(6) . ? 
C6 C22 1.523(6) . ? 
C1A C6A 1.391(5) . ? 
C1A C2A 1.398(5) . ? 
C2A C3A 1.385(6) . ? 
C3A C4A 1.357(6) . ? 
C4A C5A 1.393(6) . ? 
C5A C6A 1.386(5) . ? 
C6A S7A 1.793(4) . ? 
S7A C8A 1.801(4) . ? 
C11 C16 1.391(5) . ? 
C11 C12 1.396(5) . ? 
F12 C12 1.345(4) . ? 
C12 C13 1.369(6) . ? 
F13 C13 1.337(4) . ? 
C13 C14 1.361(6) . ? 
F14 C14 1.339(5) . ? 
C14 C15 1.384(6) . ? 
F15 C15 1.338(5) . ? 
C15 C16 1.361(6) . ? 
F16 C16 1.357(4) . ? 
C21 C26 1.383(5) . ? 
C21 C22 1.424(6) . ? 
C22 C23 1.383(5) . ? 
F23 C23 1.350(5) . ? 
C23 C24 1.381(6) . ? 
C24 F24 1.337(5) . ? 
C24 C25 1.352(7) . ? 
F25 C25 1.335(5) . ? 
C25 C26 1.383(6) . ? 
F26 C26 1.341(5) . ? 
C1S Cl11 1.747(5) . ? 
C1S Cl13 1.761(5) . ? 
C1S Cl12 1.764(4) . ? 
C2S Cl22 1.735(5) . ? 
C2S Cl21 1.747(5) . ? 
C2S Cl23 1.761(5) . ? 
C3S Cl32 1.693(6) . ? 
C3S Cl31 1.720(6) . ? 
C3S Cl3' 1.746(7) . ? 
C3S Cl33 1.757(6) . ? 
C3S Cl3" 1.759(6) . ? 
C3S Cl3# 1.785(7) . ? 
Cl3# Cl3# 2.459(10) 2_455 ? 
B1 F1 1.375(6) . ? 
B1 F2 1.383(7) . ? 
B1 F3 1.384(6) . ? 
B1 F4 1.394(9) . ? 
B1 F4' 1.440(11) . ? 
  
loop_ 
 _geom_angle_atom_site_label_1 
 _geom_angle_atom_site_label_2 
 _geom_angle_atom_site_label_3 
 _geom_angle 
 _geom_angle_site_symmetry_1 
 _geom_angle_site_symmetry_3 
 _geom_angle_publ_flag 
C1 Rh1 C5 39.09(15) . . ? 
C1 Rh1 C2 38.65(15) . . ? 
C5 Rh1 C2 64.71(16) . . ? 
C1 Rh1 C4 64.48(15) . . ? 
C5 Rh1 C4 38.50(15) . . ? 
C2 Rh1 C4 63.65(15) . . ? 
C1 Rh1 C3 63.66(15) . . ? 
C5 Rh1 C3 63.02(16) . . ? 
C2 Rh1 C3 38.16(15) . . ? 
C4 Rh1 C3 36.56(15) . . ? 
C1 Rh1 P1 92.21(11) . . ? 
C5 Rh1 P1 115.73(11) . . ? 
C2 Rh1 P1 105.93(11) . . ? 
C4 Rh1 P1 153.96(11) . . ? 
C3 Rh1 P1 143.35(11) . . ? 
C1 Rh1 S7A 121.43(11) . . ? 
C5 Rh1 S7A 90.70(11) . . ? 
C2 Rh1 S7A 155.31(12) . . ? 
C4 Rh1 S7A 96.10(11) . . ? 
C3 Rh1 S7A 129.51(12) . . ? 
P1 Rh1 S7A 86.10(4) . . ? 
C1 Rh1 Cl1 143.74(11) . . ? 
C5 Rh1 Cl1 150.89(11) . . ? 
C2 Rh1 Cl1 105.79(12) . . ? 
C4 Rh1 Cl1 112.40(11) . . ? 
C3 Rh1 Cl1 92.14(12) . . ? 
P1 Rh1 Cl1 93.19(4) . . ? 
S7A Rh1 Cl1 94.71(4) . . ? 
C1A P1 C21 105.94(17) . . ? 
C1A P1 C11 106.06(18) . . ? 
C21 P1 C11 105.53(18) . . ? 
C1A P1 Rh1 107.60(13) . . ? 
C21 P1 Rh1 117.17(13) . . ? 
C11 P1 Rh1 113.76(12) . . ? 
C2 C1 C5 108.2(4) . . ? 
C2 C1 C6 127.2(4) . . ? 
C5 C1 C6 124.2(4) . . ? 
C2 C1 Rh1 72.1(2) . . ? 
C5 C1 Rh1 71.4(2) . . ? 
C6 C1 Rh1 128.0(3) . . ? 
C1 C2 C3 107.2(4) . . ? 
C1 C2 C7 127.2(4) . . ? 
C3 C2 C7 125.1(4) . . ? 
C1 C2 Rh1 69.3(2) . . ? 
C3 C2 Rh1 73.5(2) . . ? 
C7 C2 Rh1 129.0(3) . . ? 
C4 C3 C2 109.1(4) . . ? 
C4 C3 C8 126.6(4) . . ? 
C2 C3 C8 124.4(4) . . ? 
C4 C3 Rh1 70.9(2) . . ? 
C2 C3 Rh1 68.3(2) . . ? 
C8 C3 Rh1 127.4(3) . . ? 
C3 C4 C5 108.0(4) . . ? 
C3 C4 C9 127.2(4) . . ? 
C5 C4 C9 124.7(4) . . ? 
C3 C4 Rh1 72.6(2) . . ? 
C5 C4 Rh1 68.5(2) . . ? 
C9 C4 Rh1 127.2(3) . . ? 
C1 C5 C4 107.5(4) . . ? 
C1 C5 C10 126.7(4) . . ? 
C4 C5 C10 125.5(4) . . ? 
C1 C5 Rh1 69.5(2) . . ? 
C4 C5 Rh1 73.0(2) . . ? 
C10 C5 Rh1 127.1(3) . . ? 
C1 C6 C22 121.3(4) . . ? 
C6A C1A C2A 119.2(4) . . ? 
C6A C1A P1 117.0(3) . . ? 
C2A C1A P1 123.6(3) . . ? 
C3A C2A C1A 118.7(4) . . ? 
C4A C3A C2A 122.0(4) . . ? 
C3A C4A C5A 120.2(4) . . ? 
C6A C5A C4A 118.7(4) . . ? 
C5A C6A C1A 121.2(4) . . ? 
C5A C6A S7A 117.8(3) . . ? 
C1A C6A S7A 120.9(3) . . ? 
C6A S7A C8A 101.5(2) . . ? 
C6A S7A Rh1 104.70(13) . . ? 
C8A S7A Rh1 114.23(18) . . ? 
C16 C11 C12 114.9(4) . . ? 
C16 C11 P1 120.3(3) . . ? 
C12 C11 P1 124.3(3) . . ? 
F12 C12 C13 116.9(3) . . ? 
F12 C12 C11 120.9(4) . . ? 
C13 C12 C11 122.2(4) . . ? 
F13 C13 C14 120.0(4) . . ? 
F13 C13 C12 119.6(4) . . ? 
C14 C13 C12 120.4(4) . . ? 
F14 C14 C13 120.5(4) . . ? 
F14 C14 C15 119.8(4) . . ? 
C13 C14 C15 119.7(4) . . ? 
F15 C15 C16 121.0(4) . . ? 
F15 C15 C14 120.2(4) . . ? 
C16 C15 C14 118.8(4) . . ? 
F16 C16 C15 117.8(4) . . ? 
F16 C16 C11 118.4(4) . . ? 
C15 C16 C11 123.8(4) . . ? 
C26 C21 C22 117.0(3) . . ? 
C26 C21 P1 120.2(3) . . ? 
C22 C21 P1 122.8(3) . . ? 
C23 C22 C21 118.2(4) . . ? 
C23 C22 C6 115.1(4) . . ? 
C21 C22 C6 126.4(3) . . ? 
F23 C23 C24 117.7(4) . . ? 
F23 C23 C22 119.4(4) . . ? 
C24 C23 C22 122.9(4) . . ? 
F24 C24 C25 121.2(4) . . ? 
F24 C24 C23 119.7(4) . . ? 
C25 C24 C23 119.1(4) . . ? 
F25 C25 C24 120.6(4) . . ? 
F25 C25 C26 119.8(4) . . ? 
C24 C25 C26 119.6(4) . . ? 
F26 C26 C25 115.9(4) . . ? 
F26 C26 C21 121.0(3) . . ? 
C25 C26 C21 123.2(4) . . ? 
Cl11 C1S Cl13 110.2(2) . . ? 
Cl11 C1S Cl12 109.9(3) . . ? 
Cl13 C1S Cl12 110.0(2) . . ? 
Cl22 C2S Cl21 111.6(3) . . ? 
Cl22 C2S Cl23 110.2(3) . . ? 
Cl21 C2S Cl23 110.0(3) . . ? 
Cl32 C3S Cl31 115.4(4) . . ? 
Cl32 C3S Cl3' 142.6(4) . . ? 
Cl31 C3S Cl3' 37.4(3) . . ? 
Cl32 C3S Cl33 110.6(4) . . ? 
Cl31 C3S Cl33 109.1(3) . . ? 
Cl3' C3S Cl33 73.9(3) . . ? 
Cl32 C3S Cl3" 70.0(3) . . ? 
Cl31 C3S Cl3" 129.9(4) . . ? 
Cl3' C3S Cl3" 106.6(4) . . ? 
Cl33 C3S Cl3" 40.7(2) . . ? 
Cl32 C3S Cl3# 45.6(3) . . ? 
Cl31 C3S Cl3# 71.7(3) . . ? 
Cl3' C3S Cl3# 106.8(4) . . ? 
Cl33 C3S Cl3# 140.8(4) . . ? 
Cl3" C3S Cl3# 107.4(4) . . ? 
C3S Cl3# Cl3# 156.9(6) . 2_455 ? 
F1 B1 F2 108.1(4) . . ? 
F1 B1 F3 110.0(5) . . ? 
F2 B1 F3 107.9(4) . . ? 
F1 B1 F4 113.0(5) . . ? 
F2 B1 F4 98.4(5) . . ? 
F3 B1 F4 118.3(5) . . ? 
F1 B1 F4' 98.8(6) . . ? 
F2 B1 F4' 133.5(7) . . ? 
F3 B1 F4' 97.0(6) . . ? 
F4 B1 F4' 35.4(4) . . ? 
  
_diffrn_measured_fraction_theta_max    0.807 
_diffrn_reflns_theta_full              28.66 
_diffrn_measured_fraction_theta_full   0.807 
_refine_diff_density_max    0.728 
_refine_diff_density_min   -0.674 
_refine_diff_density_rms    0.123 
  
#===END

data_Compound 13b
  
_audit_creation_method            SHELXL-97 
_chemical_name_systematic 
; 
 ? 
; 
_chemical_name_common             ? 
_chemical_melting_point           ? 
_chemical_formula_moiety          ? 
_chemical_formula_sum 
 'C20 H25 Cl2 F5 P Rh' 
_chemical_formula_weight          565.18 
  
loop_ 
 _atom_type_symbol 
 _atom_type_description 
 _atom_type_scat_dispersion_real 
 _atom_type_scat_dispersion_imag 
 _atom_type_scat_source 
 'C'  'C'   0.0033   0.0016 
 'International Tables Vol C Tables 4.2.6.8 and 6.1.1.4' 
 'H'  'H'   0.0000   0.0000 
 'International Tables Vol C Tables 4.2.6.8 and 6.1.1.4' 
 'F'  'F'   0.0171   0.0103 
 'International Tables Vol C Tables 4.2.6.8 and 6.1.1.4' 
 'P'  'P'   0.1023   0.0942 
 'International Tables Vol C Tables 4.2.6.8 and 6.1.1.4' 
 'Cl'  'Cl'   0.1484   0.1585 
 'International Tables Vol C Tables 4.2.6.8 and 6.1.1.4' 
 'Rh'  'Rh'  -1.1178   0.9187 
 'International Tables Vol C Tables 4.2.6.8 and 6.1.1.4' 
  
_symmetry_cell_setting            Monoclinic 
_symmetry_space_group_name_H-M    P2(1)/c 
  
loop_ 
 _symmetry_equiv_pos_as_xyz 
 'x, y, z' 
 '-x, y+1/2, -z+1/2' 
 '-x, -y, -z' 
 'x, -y-1/2, z-1/2' 
  
_cell_length_a                    8.267(4) 
_cell_length_b                    35.806(19) 
_cell_length_c                    8.288(4) 
_cell_angle_alpha                 90.00 
_cell_angle_beta                  116.566(8) 
_cell_angle_gamma                 90.00 
_cell_volume                      2194(2) 
_cell_formula_units_Z             4 
_cell_measurement_temperature     153(2) 
_cell_measurement_reflns_used     ? 
_cell_measurement_theta_min       ? 
_cell_measurement_theta_max       ? 
  
_exptl_crystal_description        block 
_exptl_crystal_colour             orange/red 
_exptl_crystal_size_max           0.35 
_exptl_crystal_size_mid           0.28 
_exptl_crystal_size_min           0.20 
_exptl_crystal_density_meas       not_measured 
_exptl_crystal_density_diffrn     1.711 
_exptl_crystal_density_method     'not measured' 
_exptl_crystal_F_000              1136 
_exptl_absorpt_coefficient_mu     1.141 
_exptl_absorpt_correction_type    Emprical 
_exptl_absorpt_correction_T_min   0.898 
_exptl_absorpt_correction_T_max   1.000 
_exptl_absorpt_process_details    'SADABS (Bruker 1998)' 
  
_exptl_special_details 
; 
 ? 
; 
  
_diffrn_ambient_temperature       153(2) 
_diffrn_radiation_wavelength      0.71073 
_diffrn_radiation_type            MoK\a 
_diffrn_radiation_source          'fine-focus sealed tube' 
_diffrn_radiation_monochromator   graphite 
_diffrn_measurement_device_type   'CCD area detector' 
_diffrn_measurement_method        'phi and omega scans' 
_diffrn_detector_area_resol_mean  ? 
_diffrn_standards_number          ? 
_diffrn_standards_interval_count  ? 
_diffrn_standards_interval_time   ? 
_diffrn_standards_decay_%         ? 
_diffrn_reflns_number             9676 
_diffrn_reflns_av_R_equivalents   0.1421 
_diffrn_reflns_av_sigmaI/netI     0.1605 
_diffrn_reflns_limit_h_min        -8 
_diffrn_reflns_limit_h_max        8 
_diffrn_reflns_limit_k_min        -38 
_diffrn_reflns_limit_k_max        36 
_diffrn_reflns_limit_l_min        -8 
_diffrn_reflns_limit_l_max        8 
_diffrn_reflns_theta_min          1.14 
_diffrn_reflns_theta_max          22.50 
_reflns_number_total              2860 
_reflns_number_gt                 1508 
_reflns_threshold_expression      >2sigma(I) 
  
_computing_data_collection        'Bruker SMART' 
_computing_cell_refinement        'Bruker SMART' 
_computing_data_reduction         'Bruker SHELXTL' 
_computing_structure_solution     'SHELXS-97 (Sheldrick, 1990)' 
_computing_structure_refinement   'SHELXL-97 (Sheldrick, 1997)' 
_computing_molecular_graphics     'Bruker SHELXTL' 
_computing_publication_material   'Bruker SHELXTL' 
  
_refine_special_details 
; 
 Refinement of F^2^ against ALL reflections.  The weighted R-factor wR and 
 goodness of fit S are based on F^2^, conventional R-factors R are based 
 on F, with F set to zero for negative F^2^. The threshold expression of 
 F^2^ > 2sigma(F^2^) is used only for calculating R-factors(gt) etc. and is 
 not relevant to the choice of reflections for refinement.  R-factors based 
 on F^2^ are statistically about twice as large as those based on F, and R- 
 factors based on ALL data will be even larger. 
; 
  
_refine_ls_structure_factor_coef  Fsqd 
_refine_ls_matrix_type            full 
_refine_ls_weighting_scheme       calc 
_refine_ls_weighting_details 
 'calc w=1/[\s^2^(Fo^2^)+(0.1438P)^2^+0.0000P] where P=(Fo^2^+2Fc^2^)/3' 
_atom_sites_solution_primary      direct 
_atom_sites_solution_secondary    difmap 
_atom_sites_solution_hydrogens    geom 
_refine_ls_hydrogen_treatment     calc 
_refine_ls_extinction_method      none 
_refine_ls_extinction_coef        ? 
_refine_ls_number_reflns          2860 
_refine_ls_number_parameters      269 
_refine_ls_number_restraints      0 
_refine_ls_R_factor_all           0.1511 
_refine_ls_R_factor_gt            0.0916 
_refine_ls_wR_factor_ref          0.2564 
_refine_ls_wR_factor_gt           0.2242 
_refine_ls_goodness_of_fit_ref    0.953 
_refine_ls_restrained_S_all       0.953 
_refine_ls_shift/su_max           0.000 
_refine_ls_shift/su_mean          0.000 
  
loop_ 
 _atom_site_label 
 _atom_site_type_symbol 
 _atom_site_fract_x 
 _atom_site_fract_y 
 _atom_site_fract_z 
 _atom_site_U_iso_or_equiv 
 _atom_site_adp_type 
 _atom_site_occupancy 
 _atom_site_symmetry_multiplicity 
 _atom_site_calc_flag 
 _atom_site_refinement_flags 
 _atom_site_disorder_assembly 
 _atom_site_disorder_group 
Rh1 Rh 1.06039(17) 0.16491(3) 0.22206(17) 0.0294(5) Uani 1 1 d . . . 
Cl1 Cl 1.2704(6) 0.17623(12) 0.5314(6) 0.0439(12) Uani 1 1 d . . . 
Cl2 Cl 0.8212(6) 0.16754(12) 0.3088(6) 0.0442(12) Uani 1 1 d . . . 
C1 C 0.979(2) 0.1670(5) -0.068(2) 0.035(4) Uani 1 1 d . . . 
C2 C 0.899(2) 0.1971(5) -0.020(2) 0.036(4) Uani 1 1 d . . . 
C3 C 1.044(3) 0.2199(5) 0.105(2) 0.043(5) Uani 1 1 d . . . 
C4 C 1.206(2) 0.2024(5) 0.131(2) 0.038(5) Uani 1 1 d . . . 
C5 C 1.168(3) 0.1699(4) 0.022(2) 0.036(4) Uani 1 1 d . . . 
C6 C 0.872(3) 0.1398(6) -0.215(2) 0.069(7) Uani 1 1 d . . . 
H6A H 0.7555 0.1350 -0.2158 0.103 Uiso 1 1 calc R . . 
H6B H 0.9399 0.1163 -0.1947 0.103 Uiso 1 1 calc R . . 
H6C H 0.8523 0.1503 -0.3321 0.103 Uiso 1 1 calc R . . 
C7 C 0.703(2) 0.2057(7) -0.100(3) 0.068(7) Uani 1 1 d . . . 
H7A H 0.6359 0.1876 -0.1953 0.102 Uiso 1 1 calc R . . 
H7B H 0.6813 0.2310 -0.1506 0.102 Uiso 1 1 calc R . . 
H7C H 0.6616 0.2041 -0.0059 0.102 Uiso 1 1 calc R . . 
C8 C 1.024(3) 0.2563(5) 0.189(3) 0.075(7) Uani 1 1 d . . . 
H8A H 1.0261 0.2773 0.1137 0.113 Uiso 1 1 calc R . . 
H8B H 1.1242 0.2589 0.3101 0.113 Uiso 1 1 calc R . . 
H8C H 0.9091 0.2562 0.1961 0.113 Uiso 1 1 calc R . . 
C9 C 1.394(2) 0.2184(6) 0.242(2) 0.057(6) Uani 1 1 d . . . 
H9A H 1.4847 0.2002 0.2483 0.085 Uiso 1 1 calc R . . 
H9B H 1.4098 0.2237 0.3646 0.085 Uiso 1 1 calc R . . 
H9C H 1.4078 0.2415 0.1865 0.085 Uiso 1 1 calc R . . 
C10 C 1.304(3) 0.1476(6) -0.009(3) 0.058(6) Uani 1 1 d . . . 
H10A H 1.3328 0.1604 -0.0974 0.087 Uiso 1 1 calc R . . 
H10B H 1.2543 0.1228 -0.0550 0.087 Uiso 1 1 calc R . . 
H10C H 1.4142 0.1449 0.1048 0.087 Uiso 1 1 calc R . . 
P1 P 1.0940(6) 0.10199(12) 0.2907(5) 0.0275(11) Uani 1 1 d . . . 
C11 C 1.083(2) 0.0893(4) 0.499(2) 0.034(4) Uani 1 1 d . . . 
H11A H 1.1863 0.1011 0.6005 0.041 Uiso 1 1 calc R . . 
H11B H 0.9710 0.1004 0.4945 0.041 Uiso 1 1 calc R . . 
C12 C 1.083(2) 0.0480(4) 0.540(2) 0.038(4) Uani 1 1 d . . . 
H12A H 0.9701 0.0366 0.4528 0.056 Uiso 1 1 calc R . . 
H12B H 1.0954 0.0448 0.6620 0.056 Uiso 1 1 calc R . . 
H12C H 1.1855 0.0359 0.5310 0.056 Uiso 1 1 calc R . . 
C21 C 1.3045(19) 0.0797(5) 0.317(2) 0.035(4) Uani 1 1 d . . . 
H21A H 1.2965 0.0524 0.3321 0.042 Uiso 1 1 calc R . . 
H21B H 1.3196 0.0838 0.2064 0.042 Uiso 1 1 calc R . . 
C22 C 1.4706(19) 0.0953(5) 0.481(2) 0.034(4) Uani 1 1 d . . . 
H22A H 1.4757 0.1225 0.4691 0.051 Uiso 1 1 calc R . . 
H22B H 1.5808 0.0840 0.4865 0.051 Uiso 1 1 calc R . . 
H22C H 1.4607 0.0895 0.5918 0.051 Uiso 1 1 calc R . . 
C31 C 0.917(2) 0.0707(4) 0.121(2) 0.023(4) Uani 1 1 d . . . 
C32 C 0.743(2) 0.0669(5) 0.112(2) 0.033(4) Uani 1 1 d . . . 
F32 F 0.7085(12) 0.0835(3) 0.2393(13) 0.049(3) Uani 1 1 d . . . 
C33 C 0.610(2) 0.0469(5) -0.017(2) 0.034(4) Uani 1 1 d . . . 
F33 F 0.4483(13) 0.0444(3) -0.0160(14) 0.058(3) Uani 1 1 d . . . 
C34 C 0.639(2) 0.0287(5) -0.144(2) 0.034(4) Uani 1 1 d . . . 
F34 F 0.5080(12) 0.0090(3) -0.2709(13) 0.051(3) Uani 1 1 d . . . 
C35 C 0.800(2) 0.0317(4) -0.148(2) 0.031(4) Uani 1 1 d . . . 
F35 F 0.8323(12) 0.0150(3) -0.2743(11) 0.042(3) Uani 1 1 d . . . 
C36 C 0.937(2) 0.0530(4) -0.015(2) 0.030(4) Uani 1 1 d . . . 
F36 F 1.0938(12) 0.0547(3) -0.0287(11) 0.038(2) Uani 1 1 d . . . 
  
loop_ 
 _atom_site_aniso_label 
 _atom_site_aniso_U_11 
 _atom_site_aniso_U_22 
 _atom_site_aniso_U_33 
 _atom_site_aniso_U_23 
 _atom_site_aniso_U_13 
 _atom_site_aniso_U_12 
Rh1 0.0369(8) 0.0226(8) 0.0267(8) -0.0010(6) 0.0124(6) -0.0014(7) 
Cl1 0.059(3) 0.037(3) 0.029(2) -0.006(2) 0.013(2) -0.005(2) 
Cl2 0.044(3) 0.041(3) 0.052(3) 0.011(2) 0.025(2) 0.010(2) 
C1 0.055(12) 0.022(10) 0.028(9) -0.002(8) 0.017(9) -0.009(9) 
C2 0.030(10) 0.054(13) 0.023(9) 0.016(9) 0.012(8) 0.011(9) 
C3 0.087(15) 0.023(10) 0.032(10) 0.011(8) 0.039(11) 0.005(10) 
C4 0.058(12) 0.048(13) 0.014(8) 0.010(8) 0.020(8) 0.002(10) 
C5 0.066(13) 0.011(10) 0.034(10) 0.005(8) 0.026(9) -0.002(9) 
C6 0.096(17) 0.075(18) 0.038(12) -0.017(11) 0.034(12) -0.025(13) 
C7 0.061(14) 0.099(19) 0.049(13) 0.037(12) 0.029(11) 0.015(13) 
C8 0.15(2) 0.022(12) 0.090(17) 0.003(11) 0.087(17) 0.012(13) 
C9 0.055(13) 0.072(15) 0.040(12) 0.008(10) 0.018(10) -0.025(11) 
C10 0.079(15) 0.060(14) 0.053(13) 0.002(11) 0.046(12) 0.019(12) 
P1 0.038(3) 0.027(3) 0.021(2) -0.0009(19) 0.017(2) -0.002(2) 
C11 0.033(9) 0.031(11) 0.037(10) 0.001(8) 0.014(8) 0.003(8) 
C12 0.064(12) 0.032(11) 0.028(9) 0.014(8) 0.031(9) 0.004(9) 
C21 0.032(9) 0.043(12) 0.032(10) -0.002(8) 0.016(8) -0.002(8) 
C22 0.035(10) 0.043(11) 0.022(9) -0.010(8) 0.010(8) -0.004(8) 
C31 0.040(10) 0.004(8) 0.028(9) -0.004(7) 0.018(8) 0.001(7) 
C32 0.034(10) 0.028(10) 0.047(11) -0.008(9) 0.027(9) 0.002(8) 
F32 0.050(6) 0.056(7) 0.053(7) -0.021(5) 0.035(5) -0.013(5) 
C33 0.031(10) 0.054(12) 0.024(9) -0.008(9) 0.019(8) -0.014(9) 
F33 0.048(7) 0.064(8) 0.064(7) -0.020(6) 0.029(6) -0.010(6) 
C34 0.026(10) 0.043(12) 0.030(10) 0.002(9) 0.011(8) -0.002(9) 
F34 0.043(6) 0.043(7) 0.054(6) -0.019(5) 0.010(5) -0.011(5) 
C35 0.033(10) 0.027(10) 0.030(10) -0.007(8) 0.012(8) -0.015(8) 
F35 0.060(6) 0.046(7) 0.026(5) -0.014(4) 0.025(5) -0.006(5) 
C36 0.034(10) 0.019(9) 0.040(11) 0.011(8) 0.019(9) 0.000(8) 
F36 0.043(6) 0.050(7) 0.029(5) -0.007(4) 0.023(4) -0.001(5) 
  
_geom_special_details 
; 
 All esds (except the esd in the dihedral angle between two l.s. planes) 
 are estimated using the full covariance matrix.  The cell esds are taken 
 into account individually in the estimation of esds in distances, angles 
 and torsion angles; correlations between esds in cell parameters are only 
 used when they are defined by crystal symmetry.  An approximate (isotropic) 
 treatment of cell esds is used for estimating esds involving l.s. planes. 
; 
  
loop_ 
 _geom_bond_atom_site_label_1 
 _geom_bond_atom_site_label_2 
 _geom_bond_distance 
 _geom_bond_site_symmetry_2 
 _geom_bond_publ_flag 
Rh1 C4 2.155(17) . ? 
Rh1 C3 2.173(16) . ? 
Rh1 C2 2.176(15) . ? 
Rh1 C1 2.188(16) . ? 
Rh1 C5 2.208(17) . ? 
Rh1 P1 2.310(5) . ? 
Rh1 Cl2 2.389(5) . ? 
Rh1 Cl1 2.402(4) . ? 
C1 C5 1.40(2) . ? 
C1 C2 1.41(2) . ? 
C1 C6 1.50(2) . ? 
C2 C3 1.44(2) . ? 
C2 C7 1.49(2) . ? 
C3 C4 1.40(2) . ? 
C3 C8 1.52(2) . ? 
C4 C5 1.42(2) . ? 
C4 C9 1.52(2) . ? 
C5 C10 1.49(2) . ? 
P1 C11 1.825(16) . ? 
P1 C21 1.837(16) . ? 
P1 C31 1.880(15) . ? 
C11 C12 1.52(2) . ? 
C21 C22 1.54(2) . ? 
C31 C36 1.37(2) . ? 
C31 C32 1.41(2) . ? 
C32 C33 1.34(2) . ? 
C32 F32 1.351(17) . ? 
C33 F33 1.344(18) . ? 
C33 C34 1.35(2) . ? 
C34 F34 1.329(18) . ? 
C34 C35 1.35(2) . ? 
C35 F35 1.331(18) . ? 
C35 C36 1.40(2) . ? 
C36 F36 1.352(17) . ? 
  
loop_ 
 _geom_angle_atom_site_label_1 
 _geom_angle_atom_site_label_2 
 _geom_angle_atom_site_label_3 
 _geom_angle 
 _geom_angle_site_symmetry_1 
 _geom_angle_site_symmetry_3 
 _geom_angle_publ_flag 
C4 Rh1 C3 37.8(6) . . ? 
C4 Rh1 C2 63.4(6) . . ? 
C3 Rh1 C2 38.6(6) . . ? 
C4 Rh1 C1 62.5(6) . . ? 
C3 Rh1 C1 63.4(6) . . ? 
C2 Rh1 C1 37.7(6) . . ? 
C4 Rh1 C5 37.9(6) . . ? 
C3 Rh1 C5 63.8(6) . . ? 
C2 Rh1 C5 63.4(6) . . ? 
C1 Rh1 C5 37.2(6) . . ? 
C4 Rh1 P1 132.1(5) . . ? 
C3 Rh1 P1 166.1(5) . . ? 
C2 Rh1 P1 134.5(5) . . ? 
C1 Rh1 P1 104.4(4) . . ? 
C5 Rh1 P1 102.7(4) . . ? 
C4 Rh1 Cl2 138.5(5) . . ? 
C3 Rh1 Cl2 101.8(5) . . ? 
C2 Rh1 Cl2 90.5(4) . . ? 
C1 Rh1 Cl2 116.0(5) . . ? 
C5 Rh1 Cl2 152.5(5) . . ? 
P1 Rh1 Cl2 89.36(15) . . ? 
C4 Rh1 Cl1 91.1(4) . . ? 
C3 Rh1 Cl1 101.1(5) . . ? 
C2 Rh1 Cl1 138.2(5) . . ? 
C1 Rh1 Cl1 152.6(5) . . ? 
C5 Rh1 Cl1 116.4(5) . . ? 
P1 Rh1 Cl1 87.25(15) . . ? 
Cl2 Rh1 Cl1 88.44(17) . . ? 
C5 C1 C2 109.9(14) . . ? 
C5 C1 C6 126.0(17) . . ? 
C2 C1 C6 123.4(17) . . ? 
C5 C1 Rh1 72.2(9) . . ? 
C2 C1 Rh1 70.7(9) . . ? 
C6 C1 Rh1 130.8(12) . . ? 
C1 C2 C3 107.3(14) . . ? 
C1 C2 C7 125.8(17) . . ? 
C3 C2 C7 126.6(18) . . ? 
C1 C2 Rh1 71.6(9) . . ? 
C3 C2 Rh1 70.6(9) . . ? 
C7 C2 Rh1 128.0(11) . . ? 
C4 C3 C2 106.5(15) . . ? 
C4 C3 C8 127.3(18) . . ? 
C2 C3 C8 126.1(18) . . ? 
C4 C3 Rh1 70.4(10) . . ? 
C2 C3 Rh1 70.8(9) . . ? 
C8 C3 Rh1 124.9(12) . . ? 
C3 C4 C5 110.2(16) . . ? 
C3 C4 C9 124.6(17) . . ? 
C5 C4 C9 124.9(17) . . ? 
C3 C4 Rh1 71.8(10) . . ? 
C5 C4 Rh1 73.1(10) . . ? 
C9 C4 Rh1 126.8(11) . . ? 
C1 C5 C4 106.1(15) . . ? 
C1 C5 C10 128.0(16) . . ? 
C4 C5 C10 125.3(17) . . ? 
C1 C5 Rh1 70.6(10) . . ? 
C4 C5 Rh1 69.0(9) . . ? 
C10 C5 Rh1 132.4(12) . . ? 
C11 P1 C21 103.1(7) . . ? 
C11 P1 C31 101.8(7) . . ? 
C21 P1 C31 102.2(7) . . ? 
C11 P1 Rh1 115.1(5) . . ? 
C21 P1 Rh1 117.2(6) . . ? 
C31 P1 Rh1 115.4(5) . . ? 
C12 C11 P1 117.2(11) . . ? 
C22 C21 P1 111.7(11) . . ? 
C36 C31 C32 114.0(14) . . ? 
C36 C31 P1 123.3(12) . . ? 
C32 C31 P1 122.4(12) . . ? 
C33 C32 F32 117.9(14) . . ? 
C33 C32 C31 123.3(15) . . ? 
F32 C32 C31 118.8(14) . . ? 
C32 C33 F33 119.8(14) . . ? 
C32 C33 C34 120.4(15) . . ? 
F33 C33 C34 119.7(14) . . ? 
F34 C34 C33 120.7(14) . . ? 
F34 C34 C35 119.0(15) . . ? 
C33 C34 C35 120.3(16) . . ? 
F35 C35 C34 122.0(14) . . ? 
F35 C35 C36 119.4(14) . . ? 
C34 C35 C36 118.6(16) . . ? 
F36 C36 C31 121.7(14) . . ? 
F36 C36 C35 115.1(14) . . ? 
C31 C36 C35 123.2(15) . . ? 
  
_diffrn_measured_fraction_theta_max    1.000 
_diffrn_reflns_theta_full              22.50 
_diffrn_measured_fraction_theta_full   1.000 
_refine_diff_density_max    2.826 
_refine_diff_density_min   -1.153 
_refine_diff_density_rms    0.239 
  
#===END
